1 **Manuscript Word Count:** 2987

2

3

4

5 **Title:** Associations between brain structure and sleep patterns across adolescent development

6

7 **Authors:**

8 Maria Jalbrzikowski, PhD<sup>1</sup>

9 Rebecca Hayes, PhD<sup>1</sup>

10 Kathleen E. Scully, BS<sup>1</sup>

11 Peter L. Franzen, PhD<sup>1</sup>

12 Brant P. Hasler, PhD<sup>1,2,3</sup>

13 Greg J. Siegle, PhD<sup>1,2,3</sup>

14 Daniel J. Buysse, MD<sup>1,3</sup>

15 Ron E. Dahl, MD<sup>4</sup>

16 Erika E. Forbes, PhD<sup>1,2,3,5</sup>

17 Cecile D. Ladouceur, PhD<sup>1</sup>

18 Dana L. McMakin, PhD<sup>6</sup>

19 Neal D. Ryan, MD<sup>1</sup>

20 Jennifer S. Silk, PhD<sup>4</sup>

21 Tina R. Goldstein, PhD<sup>1,4</sup>

22 Adriane M. Soehner, PhD<sup>1</sup>

23

24 <sup>1</sup>Department of Psychiatry, University of Pittsburgh School of Medicine

25 <sup>2</sup>Department of Psychology, University of Pittsburgh

26 <sup>3</sup>Department of Clinical and Translational Science, University of Pittsburgh School of Medicine

27 <sup>4</sup>Department of Public Health, University of California, Berkeley

28 <sup>5</sup>Department of Pediatrics, University of Pittsburgh School of Medicine

29 <sup>6</sup>Department of Psychology, Florida International University

30

31

32 **Corresponding Author:**

33 Adriane Soehner, PhD

34 Department of Psychiatry

35 University of Pittsburgh

36 Loeffler Building, Room 304

37 121 Meyran Ave

38 Pittsburgh, PA 15213

39 412-383-8200

40 [soehneram2@upmc.edu](mailto:soehneram2@upmc.edu)

41

42

43

44

45 **KEY POINTS**

46

47 **Question:** Does age modulate associations between gray matter structure and actigraphic  
48 sleep patterns across adolescent development?

49 **Findings:** This cross-sectional study reports stable associations between regional gray matter  
50 structure and shorter duration, later timing, and poorer continuity of sleep from ages 9 to 25  
51 years-old, as well as developmentally-specific associations that are present only from late  
52 childhood to early-to-mid adolescence.

53 **Meaning:** Stronger coupling of gray matter and sleep patterns from late childhood to early-to-  
54 mid adolescence potentially implicates this discrete developmental window as a period of  
55 vulnerability to adverse sleep-brain interactions. Sleep intervention during this developmental  
56 stage may support healthier neurodevelopmental trajectories.

57

58

59

60

61

62

63

64

65

66

67

68

69

70

71

72

73

74 **ABSTRACT**

75

76 **Importance:** Structural brain maturation and sleep are complex processes that exhibit  
77 significant changes over adolescence and are linked to healthy physical and mental  
78 development. The precise timing and magnitude of these changes influence function throughout  
79 the lifespan. However, the relationships between gray matter structure and sleep patterns  
80 during adolescence are not fully understood. A detailed characterization of brain-sleep  
81 associations during this sensitive period is crucial for understanding factors contributing to  
82 optimal neurodevelopmental trajectories in adolescence.

83 **Objective:** To investigate whether sleep-gray matter relationships are developmentally-invariant  
84 (i.e., stable across age) or developmentally-specific (i.e., only present during discrete time  
85 windows) from late childhood through young adulthood.

86 **Setting:** The Neuroimaging and Pediatric Sleep Databank was constructed from 8 research  
87 studies conducted at the University of Pittsburgh between 2009 and 2020.

88 **Participants:** The final sample consisted of 240 participants without current psychiatric  
89 diagnoses (9-25 years), and with good quality sleep tracking and structural MRI (sMRI) data.

90 **Design:** Participants completed a sMRI scan and 5-7 days of wrist actigraphy to assess  
91 naturalistic sleep. We examined cross-sectional associations between sMRI measures and  
92 sleep patterns, as well as the effects of age, sex, and their interaction with sMRI measures on  
93 sleep.

94 **Main Outcome(s) and Measure(s):** Using Freesurfer software, we extracted cortical thickness  
95 and subcortical volumes from T1-weighted MRI. Sleep patterns (duration, timing, continuity,  
96 regularity) were estimated from wrist actigraphy.

97 **Results.** Shorter sleep duration, later sleep timing, and poorer sleep continuity were associated  
98 with a stable pattern of thinner cortex and altered subcortical volumes in diverse brain regions  
99 across adolescence. In a discrete subset of regions (e.g., posterior cingulate), thinner cortex  
100 was associated with these sleep patterns from late childhood through early-to-mid adolescence,  
101 but not in late adolescence and young adulthood.

102 **Conclusions and Relevance:** In childhood and adolescence, developmentally-invariant and  
103 developmentally-specific associations exist between sleep patterns and gray matter structure, in  
104 a wide array of brain regions linked to many sensory, cognitive, and emotional processes. Sleep  
105 intervention during specific developmental periods could potentially promote healthier  
106 neurodevelopmental outcomes.

107

108

## 109 INTRODUCTION

110 Structural brain maturation and sleep are complex processes that exhibit significant  
111 changes during adolescent development. The precise timing and amount of these changes in  
112 youths likely influences multiple adult outcomes. Optimal sleep and brain maturation are each  
113 known to influence adolescent health and functioning, including academic/vocational  
114 achievement, mental health, and/or risk behaviors<sup>1-10</sup>. However, relationships between gray  
115 matter structure and sleep patterns over adolescence are not fully understood; furthermore, it is  
116 unknown whether these relationships vary as a function of age. A detailed characterization of  
117 brain-sleep relationships in adolescence is important for understanding factors contributing to  
118 optimal neurodevelopmental trajectories during this sensitive period.

119 Many brain regions implicated in cognitive and emotional outcomes show a protracted  
120 developmental course through adolescence<sup>11-15</sup>, indicating that periods of heightened plasticity  
121 also come with greater vulnerability<sup>15,16</sup>. Cortical thickness usually peaks by age 9-10 and then  
122 decreases until early adulthood, particularly in frontal, parietal, and temporal regions<sup>4,12,17-23</sup>.  
123 Most subcortical regions increase in volume until ~14-15 years, with growth plateauing  
124 afterwards<sup>13,24,25</sup>. Deviations from these normative trajectories may increase vulnerability to  
125 diverse negative outcomes, including poorer academic performance, mental health difficulties,  
126 and/or risky behaviors.

127 During adolescence, brain structural maturation is accompanied by multiple cognitive,  
128 behavioral, and emotional changes, including changes in sleep. Adolescence is characterized  
129 by a circadian phase delay and reduced homeostatic sleep drive, contributing to later sleep  
130 timing<sup>26,27</sup>. These biological shifts converge with psychosocial and behavioral factors (e.g.,  
131 school start times, peer socializing) to result in insufficient sleep and, at times, poorer sleep  
132 regularity or continuity<sup>26,27</sup>. Disruptions to the timing, duration, continuity, and regularity of sleep  
133 predict and track with the severity of adverse cognitive and emotional outcomes (e.g., poor  
134 school performance, depression, substance use)<sup>28-32</sup>.

135           Developmental shifts in sleep characteristics may possess reciprocal relationships with  
136 brain structural maturation<sup>33–36</sup>, ultimately influencing diverse outcomes. While sleep serves  
137 multiple purposes, one such function is to support synaptic plasticity and reorganization of brain  
138 circuitry<sup>24</sup>. Sleep disruption was originally considered a *consequence* of brain structural  
139 abnormalities; however, recent animal data indicate that sleep disruption during periods of  
140 heightened developmental plasticity also *cause* deviations in brain maturation<sup>37–39</sup>. These  
141 translational studies imply stronger brain-sleep relationships in certain developmental  
142 windows<sup>37,40</sup>. Yet, in humans it is unknown whether brain-sleep relationships are stable across  
143 adolescent development (i.e., developmentally-invariant relationships) or only occur during a  
144 discrete window of development (i.e., developmentally-specific relationships). Developmentally-  
145 specific brain-sleep relationships could inform the optimal timing of brain and/or sleep-based  
146 interventions that promote healthier neurodevelopmental outcomes. Several initial reports have  
147 identified ties between diverse gray matter structures and sleep in pediatric populations<sup>41–48</sup>.  
148 However, developmentally-specific relationships have not been examined and these studies  
149 have been restricted to retrospective self-report or lab-based sleep measures that do not reflect  
150 usual sleep. An important next step is to evaluate how brain structure relates to objective,  
151 ecologically-valid sleep patterns (as captured by wrist actigraphy) through a developmental lens.

152           To address these open questions, we created the Neuroimaging and Pediatric Sleep  
153 (NAPS) Databank, a large, harmonized cross-sectional databank comprised of healthy children,  
154 adolescents, and young adults (ages 9-25yr). We estimated sleep from wrist actigraphy and  
155 sMRI measures from T1-weighted MRI. Given that a wide array of sMRI measures have been  
156 associated with sleep, we conducted data-driven regularized regression analyses, to test many  
157 potential predictors while minimizing the issues of predictor inter-correlation and multiple  
158 comparisons. We explored developmentally-invariant and developmentally-specific associations  
159 between sMRI measures (subcortical volume, cortical thickness) and core sleep dimensions  
160 (sleep duration, timing, continuity, regularity). Because there are important sex differences in

161 sleep and brain development<sup>17,49–54</sup>, we also explored the interaction between self-reported sex  
162 and neuroimaging measures on sleep outcomes.

163

## 164 **METHODS**

### 165 **Participants**

166 The initial NAPS databank includes a total of 307 participants drawn from eight  
167 University of Pittsburgh studies conducted between the years of 2009 to 2020. Studies were  
168 considered for inclusion in NAPS if they included: a) actigraphic sleep monitoring; b) a sMRI  
169 scan; c) a baseline assessment reflecting naturalistic sleep; and d) participants aged 8-30  
170 years-old (inclusive). Participant-level inclusion criteria were: a) 8-25 years-old; b) absence of  
171 current psychiatric diagnosis based on clinical interview (i.e., KSADS, SCID); c) no current  
172 psychotropic or hypnotic medication use; d) ≥5 days of good quality actigraphic sleep monitoring  
173 composed of both weekday and weekend days; e) good quality MRI scan. Demographics of the  
174 final analytic sample of N=240 are described in **Table 1**. Demographics by protocol are reported  
175 in **eTable 1** and reasons for participant exclusion are documented in the **eMethods**.

### 176 **Neuroimaging Methods and Outcomes**

177 Please see **eTable 2** for sMRI protocol parameters. We used the FreeSurfer analysis  
178 software<sup>55–58</sup> (v6.0) to extract measures of cortical thickness (Desikan-Killiany atlas<sup>59</sup>, n=34  
179 measures) and subcortical volume (aseg.mgz atlas, n=8 measures) averaged across two  
180 hemispheres. We implemented a quality assessment pipeline developed by and used for the  
181 Enhancing Neuroimaging Genetics through Meta-Analysis consortium<sup>60–70</sup>. An automated  
182 MRIQC T1w-classifier determined individual scan quality based on a reference template<sup>71</sup>. We  
183 adjusted neuroimaging data for scanner protocol effects with ComBat<sup>72,73</sup>.

### 184 **Wrist Actigraphy**

185 Actigraphy is a well-validated and widely-used tool for objectively assessing naturalistic  
186 sleep in children, adolescents, and adults<sup>74–76</sup>. Participants continuously wore wrist actigraphs

187 on their non-dominant wrist during a monitoring period of 5 or more consecutive days<sup>77</sup>. **eTable**  
188 **1** describes the number of participants who wore watches from Philips Respironics (PR;  
189 Actiwach-64, Actiwatch2, Spectrum series) or Ambulatory Monitoring, Inc. (AMI; Basic  
190 Octagonal Motionlogger). Wrist activity was sampled in 1-minute intervals (epochs). Participants  
191 were asked to indicate via button press the start and end of each sleep interval.

192 We estimated sleep from wrist actigraphy using a combination of validated brand-  
193 specific sleep algorithms (PR Medium Threshold; AMI Sadeh) and standardized visual editing  
194 procedures<sup>78–80</sup>. Trained scorers blinded to neuroimaging data manually identified rest intervals  
195 based on a combination of event markers indicated by participants and clear changes in activity  
196 and (if available) environmental light level recorded by the device. Brand-specific sleep scoring  
197 algorithms estimated sleep within each rest interval<sup>74,75,79,81–83</sup>. We implemented additional semi-  
198 automated quality assurance procedures using in-house R scripts, including identification of the  
199 main rest interval (defined as the longest rest interval each day), removal of invalid sleep  
200 intervals containing  $\geq 1$  hour of off-wrist time or recording errors<sup>79,84</sup>, time adjustment for daylight  
201 savings time, and final visual inspection of sleep intervals on raster plots.

## 202 **Sleep Outcomes**

203 Primary actigraphy sleep outcomes were based on the main rest interval. We selected  
204 four sleep outcomes corresponding to key dimensions of sleep health<sup>85</sup>: sleep duration (total  
205 sleep time in minutes), timing (midpoint between sleep onset and offset in minutes from  
206 midnight), continuity (minutes awake after sleep onset; WASO), and regularity (intra-individual  
207 standard deviation of midpoint in minutes). The first three outcomes were averaged over the 5-7  
208 tracking days most proximal to their MRI scan; regularity was calculated from the available days  
209 of recording. Sleep variables were natural log transformed to normalize distributions.

## 210 **Statistical Analyses**

211 We first conducted general additive models to confirm that the four sleep outcomes  
212 showed age-associated patterns consistent with prior research (**eFigure 1**). We observed the



213 characteristic decline in sleep duration, delay in sleep timing, and increased sleep variability  
214 over adolescent development. Sleep continuity did not vary with age.

215 We were interested in developmentally-invariant effects (i.e., main effects) of  
216 neuroimaging measures on the four sleep outcomes, as well as developmentally-specific effects  
217 (i.e., interactions between age and neuroimaging measures). Due to the large number of and  
218 multicollinearity amongst neuroimaging measures, we used regularized regression<sup>86</sup> to identify  
219 non-zero predictors associated with sleep outcomes. We used the R package, Group-Lasso-  
220 INTERaction-NET (glinetnet<sup>87,88</sup>) to examine main effects of structural neuroimaging measures,  
221 as well as their interaction with age and sex, for each sleep variable. Only potential interactions  
222 between non-zero main effects are considered. We included multiple actigraphy covariates (i.e.,  
223 tracking days, season, ratio of weekday to weekend days, actigraph model) as potential  
224 predictors in the models. **eTable 3** contains the full list of 48 predictors. We repeated 10-fold  
225 cross validation 100 times, using the penalty parameter ( $\lambda$ ) one standard deviation away from  
226 the minimal cross-validation error. The final model was the model was selected most often  
227 during this procedure. Regularized regression selects variables based on minimizing error in the  
228 model as opposed to statistical significance as in standard regression. Thus, p-values are not  
229 reported for non-zero coefficients.

230 Non-zero predictors selected by group-lasso models were entered into linear regression  
231 models, as in prior reports<sup>89,90</sup>. R-squared was computed to estimate variance explained by the  
232 full model as well as groups of predictors (i.e., demographics, neuroimaging measures,  
233 actigraphy covariates). We assessed non-zero interactions between age and neuroimaging  
234 predictors with the Johnson-Neyman technique, which obtains parameter estimates and points  
235 of significance from the interaction between two continuous variables<sup>91-93</sup>. Non-zero interactions  
236 between sex and neuroimaging predictors were probed by comparing estimated marginal  
237 means<sup>94</sup>.

238

239 **RESULTS**

240 All neuroimaging measures, and their interactions with age and sex, selected as non-  
241 zero predictors of sleep outcomes are reported in **Table 2**. Non-zero actigraphy covariates (e.g.,  
242 season, actigraph type) are reported in **eTable 4**.

243

244 **Sleep Duration (Total Sleep Time)**

245 The main effects of neuroimaging measures, age, sex, and their respective interactions  
246 accounted for 25% of the total variance in sleep duration (**Table 2A**). Shorter sleep duration was  
247 associated with older age and males had shorter sleep duration in comparison to females.

248 We observed several developmentally-invariant relationships between brain structure  
249 and sleep duration. From 9-25 years old, greater volume in the pallidum, hippocampus, and  
250 amygdala was associated with shorter sleep duration. Additionally, thinner medial orbitofrontal  
251 and isthmus (posterior) cingulate cortices were associated shorter sleep duration. Thinner  
252 cortex in the posterior cingulate was associated with shorter sleep duration in both sexes, but  
253 there was a stronger relationship in males. Conversely, thinner parahippocampal cortex and  
254 shorter sleep duration were associated in females, but not males.

255 We also found developmentally-specific relationships between gray matter structure and  
256 sleep duration (**Figure 2A**). In late childhood through middle adolescence, thinner cortex in the  
257 cuneus (9-17.3 years) and superior parietal regions (9-16.0 years) was associated with shorter  
258 sleep duration; however, this relationship was not observed at older ages. From 21.9-25.9 years  
259 old, greater lateral ventricle volume was associated with longer sleep duration.

260 **Sleep Timing (Midsleep)**

261 The main effects of neuroimaging measures, age, and their interactions accounted for  
262 20% of the variance in midsleep (**Table 2B**). Midsleep was later in males and among older  
263 participants.

264           Developmentally-invariant relationships were identified for several brain regions.  
265           Specifically, lower thalamus volume was associated with later midsleep; this was relationship  
266           driven by males. In females only, greater lateral ventricle volume was associated with later  
267           midsleep. Thinner superior parietal and lateral occipital cortices were associated with later sleep  
268           timing.

269           Developmentally-specific relationships were also observed between neuroimaging  
270           measures and sleep timing (**Figure 2B**). From late childhood through middle adolescence,  
271           thinner cortex in the pars orbitalis (9-15.2 years), rostral middle frontal (9-14.1 years), and  
272           posterior cingulate regions (9-14.5 years) was associated with later midsleep. Thinner medial  
273           orbitofrontal cortex in late childhood (9-10 years) was also associated with later midsleep.  
274           Greater pallidum volume was associated with later midsleep only from ages 9 to 16.8 years.

#### 275           **Sleep Continuity (WASO)**

276           The combined effects of neuroimaging measures, age, sex, and their interactions  
277           accounted for 16% of the variance in sleep continuity (**Table 2C**). WASO was longer among  
278           older participants and in females.

279           With regard to developmentally-invariant relationships, greater palladium and thalamus  
280           volume was associated with greater WASO. Thinner cortex in middle temporal, precentral, and  
281           lateral occipital regions was associated with greater WASO. Greater precentral and entorhinal  
282           cortical thickness was associated with greater WASO in females.

283           Thinner parahippocampal (9-14.6 years) and superior parietal cortices (9-16.0 years)  
284           were associated with greater WASO from late childhood to mid-adolescence, but not in older  
285           adolescents and young adults (**Figure 2C**).

#### 286           **Sleep Regularity (Midsleep Variability)**

287           Regularized regression did not identify any nonzero predictors of midsleep regularity.

288

289

## 290 **DISCUSSION**

291           Using a large sample of typical adolescent development (9.0-25.9 years), we identified  
292 developmentally-invariant and developmentally-specific relationships between gray matter  
293 structure and naturalistic sleep patterns. Shorter sleep duration, later sleep timing, and poorer  
294 sleep continuity — all of which are associated with adverse health outcomes — were associated  
295 with a stable pattern of thinner cortex and altered subcortical volumes in diverse brain regions  
296 over adolescent development. In discrete regions, developmentally-specific relationships were  
297 also observed. In these regions, thinner cortex from late childhood through early-to-mid  
298 adolescence — a pattern associated with accelerated maturation — was associated with less  
299 optimal sleep, but these relationships were not detected in late adolescence and young  
300 adulthood. Our results provide a novel view of brain-sleep structure relationships within brain  
301 structures implicated in a wide array of cognitive, emotional, and psychological processes over  
302 adolescent development<sup>2,95–100</sup>.

### 303 ***Cortical thickness in a diverse set of brain regions show developmentally-invariant*** 304 ***relationships with sleep***

305           Across adolescent development, thinner cortex in frontal, temporal, parietal, and visual  
306 processing areas was associated with shorter sleep duration, later sleep timing, and longer time  
307 awake after sleep onset. These brain regions are implicated in salience detection (pars  
308 orbitalis), motor function (precentral), memory (entorhinal, middle temporal), and attention and  
309 visuospatial perception (superior parietal cortex, lateral occipital)<sup>101</sup>. Given that sleep is  
310 associated with diverse range of mental, cognitive and physical health outcomes in  
311 adolescence<sup>1–10</sup>, it is reasonable that naturalistic sleep is related to brain structure in regions  
312 that support multiple functions. Some of these relationships were modulated by self-reported  
313 sex, consistent with reported sex differences in sleep patterns and brain development<sup>17,49–54</sup>.  
314 Future studies should also examine the extent to sex effects may be better explained by  
315 pubertal maturation.

316 ***Increased cortical thickness was associated with healthier sleep patterns from late***  
317 ***childhood to middle adolescence***

318         This is the first study, to our knowledge, to demonstrate that brain structure is related to  
319 individual differences in naturalistic sleep patterns at different ages, from late childhood through  
320 adulthood. Thicker cortex in multiple brain regions was associated with “healthier” sleep (as  
321 indicated by longer, more continuous, and earlier sleep) during late childhood and early  
322 adolescence. These findings, in conjunction with other work<sup>102</sup>, present the possibility that  
323 biological factors exert differential influences on behavior at distinct points in development.  
324 Accelerated cortical thinning/growth patterns in discrete brain regions could contribute to  
325 disruptions in sleep characteristics during late childhood and early adolescence, but not during  
326 other periods. Alternatively, disruptions in the typical age-related changes in sleep could lead to  
327 accelerating cortical thinning, particularly during this late childhood-early adolescence age  
328 range, but not during others. Multiple neurobiological mechanisms likely underlie individual  
329 differences in cortical thickness. Cortical thinning is traditionally believed to be caused by  
330 synaptic pruning, a re-wiring of synapses<sup>103,104</sup>. Translational models find that, in mice, synaptic  
331 pruning is *higher* during sleep than wakefulness in adolescents, but not adults<sup>105</sup>. More recent  
332 data suggest that age-associated changes in cortical thickness may also be driven by white  
333 matter maturational processes, i.e. myelination<sup>106</sup>. Sleep disruption is detrimental to the  
334 formation and maintenance of myelin in murine models<sup>107,108</sup>. Future longitudinal within-person  
335 investigations, particularly during late childhood and early adolescence, will be necessary to  
336 disentangle the directionality and neurobiological mechanisms of relationships between sleep,  
337 cortical thickness measures, and white matter integrity.

338 ***Unexpected relationships between poorer sleep and larger subcortical volumes***

339         Surprisingly, in many cases, we also discovered that *larger* subcortical (i.e.,  
340 hippocampal, amygdala, thalamus, and caudate) volumes are associated with more disrupted  
341 sleep patterns. One possibility is that exposure to sleep disruption at certain developmental

342 stages may be correlated with or cause *accelerated* subcortical growth patterns, akin to the  
343 acceleration-deceleration hypothesis of chronic stress and neurodevelopment<sup>109–111</sup>.  
344 Importantly, this result stands in contrast with prior research showing lower subcortical gray  
345 matter volumes in relation to poor sleep<sup>46</sup> and mental health conditions<sup>60,112,113</sup>. Thus, replication  
346 of these findings, as well as work examining the relationship between structural brain measures  
347 and sleep, needs to be further explored in informative subgroups such as individuals with  
348 mental disorders.

349 We also observed subcortical volume-sleep relationships in the expected direction. In  
350 females, larger lateral ventricle volume was associated with shorter sleep duration and later  
351 midsleep. Greater ventricle size has been linked to serious mental health conditions, including  
352 schizophrenia<sup>114</sup>. Furthermore, study of older adults also found longitudinal reduction in sleep  
353 duration corresponded to ventricular expansion over the follow-up period<sup>115</sup>.

#### 354 ***Implications for optimal timing and targets for sleep intervention***

355 If sleep patterns prove to be a causal contributor to individual differences in sMRI  
356 measures, our findings have the potential to inform developmentally-sensitive optimization of  
357 evidence-based behavioral sleep interventions<sup>116</sup>. As an example, both shorter sleep duration  
358 and later sleep timing were associated with thinner cortex in default mode network (DMN)  
359 regions (medial orbitofrontal and posterior cingulate cortices), a neural signature tied to  
360 outcomes such as depression, insomnia, and poor cognitive function<sup>98,117</sup>. DMN cortical  
361 thickness and sleep duration relationships were developmentally-invariant. However, DMN  
362 cortical thickness-sleep timing association were only present in late childhood/mid-adolescence.  
363 Thus, a sleep treatment geared toward promoting healthy DMN-relevant outcomes should  
364 include sleep extension regardless of age but also advance sleep timing in late childhood and  
365 early/mid adolescence. Taken as a whole, our findings suggest that sleep interventions,  
366 particularly in late childhood through mid-adolescence, may be advantageous for  
367 neurodevelopment and thus downstream effects on psychological well-being.

368 **Limitations**

369 Our sample, while representative of the Pittsburgh Metropolitan area, was limited in its  
370 racial and ethnic diversity, factors which contribute to individual differences in brain structure  
371 and sleep<sup>28,118</sup>. Although we adjusted for salient actigraphy covariates, actigraphy brand  
372 differences may have contributed noise in our data that was not captured by covarying for watch  
373 type in our models. Because our analyses were cross-sectional across a range of ages, rather  
374 than longitudinal within participants, it is unclear whether sleep patterns are a cause, correlate,  
375 or consequence of gray matter structure. Future, prospective longitudinal studies are necessary  
376 to disambiguate causal relationships between sleep and sMRI measures, and assess  
377 relationships between within-subject trajectories of sleep and brain development.

378 **Conclusions & Future Directions**

379 We found compelling and novel evidence for developmentally-invariant and  
380 developmentally-specific associations between sMRI measures and sleep across adolescent  
381 development. We plan to build on these findings and examine how individual differences in  
382 neuroimaging and sleep measures may identify youth at high-risk for developing adverse  
383 cognitive, mental, and physical outcomes.

384

385

386

387

388

389

390

391

392

393

394

395

396

397 **ACKNOWLEDGMENT**

398 **Author Contributions:** Drs. Soehner and Jalbrzikowski had full access to all the data and take  
399 responsibility for the integrity of the data and the accuracy of the data analysis.

400 *Concept and design of NAPS databank:* Jalbrzikowski, Soehner

401 *Concept, design, and funding for original research studies:* Franzen, Hasler, Siegle, Buysse,

402 Dahl, Forbes, Ladouceur, McMakin, Ryan, Silk, Goldstein, Soehner

403 *Acquisition, processing, or interpretation of data:* All authors.

404 *Statistical analysis:* Jalbrzikowski, Soehner

405 *Drafting of the manuscript:* Jalbrzikowski, Soehner

406 *Critical revision of the manuscript for important intellectual content:* All authors.

407 **Conflict of Interest Disclosures:** Dr. Goldstein reports receiving royalties from Guilford Press.

408 Dr. Ryan is on the Scientific Advisory Committee for Axsome Therapeutics. Dr. Buysse has

409 served as a paid consultant to Bayer, BeHealth Solutions, Cereve/Ebb Therapeutics, Emmi

410 Solutions, National Cancer Institute, Pear Therapeutics, Philips Respironics, Sleep Number, and

411 Weight Watchers International. He has served as a paid consultant for professional educational

412 programs developed by the American Academy of Physician Assistants and CME Institute, and

413 received payment for a professional education program sponsored by Eisai (content developed

414 exclusively by Dr. Buysse). Dr. Buysse is an author of the Pittsburgh Sleep Quality Index,

415 Pittsburgh Sleep Quality Index Addendum for PTSD (PSQI-A), Brief Pittsburgh Sleep Quality

416 Index (B-PSQI), Daytime Insomnia Symptoms Scale, Pittsburgh Sleep Diary, Insomnia

417 Symptom Questionnaire, and RU\_SATED (copyright held by University of Pittsburgh). These

418 instruments have been licensed to commercial entities for fees. He is also co-author of the

419 Consensus Sleep Diary (copyright held by Ryerson University), which is licensed to commercial



420 entities for a fee. Dr. Forbes has received an honorarium from Association for Psychological  
421 Science. Drs. Jalbrzikowski, Hayes, Franzen, Hasler, Siegle, Dahl, Ladouceur, McMakin, Silk,  
422 and Soehner, as well as Ms. Scully, have no relevant financial interests, activities, relationships,  
423 or affiliations to report.

424 **Funding/Support:** Dr. Jalbrzikowski was supported by grant K01MH112774 and Dr. Soehner  
425 was supported by grant K01MH111953 from the National Institute of Mental Health. Research  
426 data included in the Neuroimaging and Pediatric Sleep (NAPS) databank and reported in this  
427 publication was supported by the National Institute of Mental Health, National Institute of Drug  
428 Abuse, National Institute on Alcohol Abuse and Alcoholism, and the Pittsburgh Foundation  
429 under awards K01MH111953, R21MH102412, R01DA033064, K01MH077106, M2010-0117,  
430 K01DA032557, R21AA023209, and P50MH080215.

431 **Role of the Funder(s)/Sponsor(s):** Our funding sources had no role in the design and conduct  
432 of the study; collection, management, analysis, and interpretation of the data; preparation,  
433 review, or approval of the manuscript; and decision to submit the manuscript for publication.

434 **Previous Presentation:** These results have not previously been presented or submitted for  
435 publication.

436

437

438

439

440

441

442

443

444 **REFERENCES**

- 445 1. Pehlivanova M, Wolf DH, Sotiras A, et al. Diminished Cortical Thickness Is Associated with  
446 Impulsive Choice in Adolescence. *J Neurosci*. 2018;38(10):2471-2481.  
447 doi:10.1523/JNEUROSCI.2200-17.2018
- 448 2. Burgaleta M, Johnson W, Waber DP, Colom R, Karama S. Cognitive ability changes and  
449 dynamics of cortical thickness development in healthy children and adolescents.  
450 *Neuroimage*. 2014;84:810-819. doi:10.1016/j.neuroimage.2013.09.038
- 451 3. Foland-Ross LC, Sacchet MD, Prasad G, Gilbert B, Thompson PM, Gotlib IH. Cortical  
452 thickness predicts the first onset of major depression in adolescence. *Int J Dev Neurosci*.  
453 2015;46:125-131. doi:10.1016/j.ijdevneu.2015.07.007
- 454 4. Tamnes CK, Ostby Y, Fjell AM, Westlye LT, Due-Tønnessen P, Walhovd KB. Brain  
455 maturation in adolescence and young adulthood: regional age-related changes in cortical  
456 thickness and white matter volume and microstructure. *Cereb Cortex*. 2010;20(3):534-548.  
457 doi:10.1093/cercor/bhp118
- 458 5. Bos MGN, Peters S, van de Kamp FC, Crone EA, Tamnes CK. Emerging depression in  
459 adolescence coincides with accelerated frontal cortical thinning. *J Child Psychol*  
460 *Psychiatry*. 2018;59(9):994-1002. doi:10.1111/jcpp.12895
- 461 6. Oostermeijer S, Whittle S, Suo C, et al. Trajectories of adolescent conduct problems in  
462 relation to cortical thickness development: a longitudinal MRI study. *Transl Psychiatry*.  
463 2016;6(6):e841. doi:10.1038/tp.2016.111
- 464 7. Meruelo AD, Jacobus J, Idy E, Nguyen-Louie T, Brown G, Tapert SF. Early adolescent  
465 brain markers of late adolescent academic functioning. *Brain Imaging Behav*.  
466 2019;13(4):945-952. doi:10.1007/s11682-018-9912-2
- 467 8. Dewald JF, Meijer AM, Oort FJ, Kerkhof GA, Bögels SM. The influence of sleep quality,  
468 sleep duration and sleepiness on school performance in children and adolescents: A meta-  
469 analytic review. *Sleep Med Rev*. 2010;14(3):179-189. doi:10.1016/j.smr.2009.10.004
- 470 9. McKnight-Eily LR, Eaton DK, Lowry R, Croft JB, Presley-Cantrell L, Perry GS.  
471 Relationships between hours of sleep and health-risk behaviors in US adolescent students.  
472 *Prev Med*. 2011;53(4-5):271-273. doi:10.1016/j.ypmed.2011.06.020
- 473 10. Tarokh L, Saletin JM, Carskadon MA. Sleep in adolescence: physiology, cognition and  
474 mental health. *Neurosci Biobehav Rev*. 2016;70:182-188.  
475 doi:10.1016/j.neubiorev.2016.08.008
- 476 11. Giedd JN, White SL, Celano M. Structural Magnetic Resonance Imaging of Typical  
477 Pediatric Brain Development. In: Charney D, Nestler E, eds. *Neurobiology of Mental*  
478 *Illness*. Oxford University Press; 2011:1209-1217.  
479 doi:10.1093/med/9780199798261.003.0074
- 480 12. Giedd JN, Raznahan A, Alexander-Bloch A, Schmitt E, Gogtay N, Rapoport JL. Child  
481 Psychiatry Branch of the National Institute of Mental Health Longitudinal Structural  
482 Magnetic Resonance Imaging Study of Human Brain Development.  
483 *Neuropsychopharmacology*. 2015;40(1):43-49. doi:10.1038/npp.2014.236

- 484 13. Raznahan A, Shaw PW, Lerch JP, et al. Longitudinal four-dimensional mapping of  
485 subcortical anatomy in human development. *Proc Natl Acad Sci U S A*. 2014;111(4):1592-  
486 1597. doi:10.1073/pnas.1316911111
- 487 14. Giedd JN, Blumenthal J, Jeffries NO, et al. Brain development during childhood and  
488 adolescence: a longitudinal MRI study. *Nature Neuroscience*. 1999;2(10):861-863.  
489 doi:10.1038/13158
- 490 15. Paus T, Keshavan M, Giedd JN. Why do many psychiatric disorders emerge during  
491 adolescence? *Nat Rev Neurosci*. 2008;9(12):947–957.
- 492 16. Dahl RE. Adolescent brain development: a period of vulnerabilities and opportunities.  
493 Keynote address. *Ann N Y Acad Sci*. 2004;1021:1-22. doi:10.1196/annals.1308.001
- 494 17. Vijayakumar N, Allen NB, Youssef G, et al. Brain development during adolescence: A  
495 mixed-longitudinal investigation of cortical thickness, surface area, and volume. *Hum Brain*  
496 *Mapp*. 2016;37(6):2027-2038. doi:10.1002/hbm.23154
- 497 18. Tamnes CK, Herting MM, Goddings A-L, et al. Development of the Cerebral Cortex across  
498 Adolescence: A Multisample Study of Inter-Related Longitudinal Changes in Cortical  
499 Volume, Surface Area, and Thickness. *J Neurosci*. 2017;37(12):3402-3412.  
500 doi:10.1523/JNEUROSCI.3302-16.2017
- 501 19. Mills KL, Goddings A-L, Herting MM, et al. Structural brain development between  
502 childhood and adulthood: Convergence across four longitudinal samples. *Neuroimage*.  
503 2016;141:273–281.
- 504 20. Sowell ER, Peterson BS, Thompson PM, Welcome SE, Henkenius AL, Toga AW. Mapping  
505 cortical change across the human life span. *Nat Neurosci*. 2003;6(3):309-315.  
506 doi:10.1038/nn1008
- 507 21. Sowell ER, Thompson PM, Leonard CM, Welcome SE, Kan E, Toga AW. Longitudinal  
508 mapping of cortical thickness and brain growth in normal children. *J Neurosci*.  
509 2004;24(38):8223-8231. doi:10.1523/JNEUROSCI.1798-04.2004
- 510 22. Gogtay N, Giedd JN, Lusk L, et al. Dynamic mapping of human cortical development  
511 during childhood through early adulthood. *Proc Natl Acad Sci U S A*. 2004;101(21):8174–  
512 8179.
- 513 23. Shaw P, Greenstein D, Lerch J, et al. Intellectual ability and cortical development in  
514 children and adolescents. *Nature*. 2006;440(7084):676-679. doi:10.1038/nature04513
- 515 24. Tononi G, Cirelli C. Sleep and the price of plasticity: from synaptic and cellular  
516 homeostasis to memory consolidation and integration. *Neuron*. 2014;81(1):12-34.  
517 doi:10.1016/j.neuron.2013.12.025
- 518 25. Puentes-Mestral C, Aton SJ. Linking Network Activity to Synaptic Plasticity during Sleep:  
519 Hypotheses and Recent Data. *Front Neural Circuits*. 2017;11.  
520 doi:10.3389/fncir.2017.00061

- 521 26. Crowley SJ, Wolfson AR, Tarokh L, Carskadon MA. An update on adolescent sleep: New  
522 evidence informing the perfect storm model. *J Adolesc.* 2018;67:55-65.  
523 doi:10.1016/j.adolescence.2018.06.001
- 524 27. Crowley SJ, Van Reen E, LeBourgeois MK, et al. A longitudinal assessment of sleep  
525 timing, circadian phase, and phase angle of entrainment across human adolescence.  
526 *PLoS One.* 2014;9(11):e112199. doi:10.1371/journal.pone.0112199
- 527 28. Grandner MA. Sleep, Health, and Society. *Sleep Med Clin.* 2017;12(1):1-22.  
528 doi:10.1016/j.jsmc.2016.10.012
- 529 29. Spira AP, Chen-Edinboro LP, Wu MN, Yaffe K. Impact of sleep on the risk of cognitive  
530 decline and dementia. *Curr Opin Psychiatry.* 2014;27(6):478-483.  
531 doi:10.1097/YCO.000000000000106
- 532 30. Matricciani L, Bin YS, Lallukka T, et al. Rethinking the sleep-health link. *Sleep Health.*  
533 2018;4(4):339-348. doi:10.1016/j.sleh.2018.05.004
- 534 31. Dolsen MR, Asarnow LD, Harvey AG. Insomnia as a transdiagnostic process in psychiatric  
535 disorders. *Curr Psychiatry Rep.* 2014;16(9):471. doi:10.1007/s11920-014-0471-y
- 536 32. Soehner AM, Kaplan KA, Harvey AG. Insomnia comorbid to severe psychiatric illness.  
537 *Sleep Med Clin.* 2013;8(3):361-371. doi:10.1016/j.jsmc.2013.04.007
- 538 33. Kayser MS, Biron D. Sleep and Development in Genetically Tractable Model Organisms.  
539 *Genetics.* 2016;203(1):21-33. doi:10.1534/genetics.116.189589
- 540 34. Muehlroth BE, Werkle-Bergner M. Understanding the interplay of sleep and aging:  
541 Methodological challenges. *Psychophysiology.* 2020;57(3). doi:10.1111/psyp.13523
- 542 35. Fontanellaz-Castiglione CE, Markovic A, Tarokh L. Sleep and the adolescent brain.  
543 *Current Opinion in Physiology.* 2020;15:167-171. doi:10.1016/j.cophys.2020.01.008
- 544 36. Cirelli C, Tononi G. Cortical development, electroencephalogram rhythms, and the  
545 sleep/wake cycle. *Biol Psychiatry.* 2015;77(12):1071-1078.  
546 doi:10.1016/j.biopsych.2014.12.017
- 547 37. Kayser MS, Yue Z, Sehgal A. A Critical Period of Sleep for Development of Courtship  
548 Circuitry and Behavior in *Drosophila*. *Science.* 2014;344(6181):269-274.  
549 doi:10.1126/science.1250553
- 550 38. Seugnet L, Suzuki Y, Donlea JM, Gottschalk L, Shaw PJ. Sleep Deprivation During Early-  
551 Adult Development Results in Long-Lasting Learning Deficits in Adult *Drosophila*. *Sleep.*  
552 2011;34(2):137-146.
- 553 39. Frank MG, Issa NP, Stryker MP. Sleep enhances plasticity in the developing visual cortex.  
554 *Neuron.* 2001;30(1):275-287. doi:10.1016/s0896-6273(01)00279-3
- 555 40. Novati A, Hulshof HJ, Koolhaas JM, Lucassen PJ, Meerlo P. Chronic sleep restriction  
556 causes a decrease in hippocampal volume in adolescent rats, which is not explained by

- 557 changes in glucocorticoid levels or neurogenesis. *Neuroscience*. 2011;190:145-155.  
558 doi:10.1016/j.neuroscience.2011.06.027
- 559 41. Goldstone A, Willoughby AR, de Zambotti M, et al. The mediating role of cortical thickness  
560 and gray matter volume on sleep slow-wave activity during adolescence. *Brain Struct*  
561 *Funct*. 2018;223(2):669-685. doi:10.1007/s00429-017-1509-9
- 562 42. Cheng W, Rolls E, Gong W, et al. Sleep duration, brain structure, and psychiatric and  
563 cognitive problems in children. *Mol Psychiatry*. Published online February 3, 2020.  
564 doi:10.1038/s41380-020-0663-2
- 565 43. Urrila AS, Artiges E, Massicotte J, et al. Sleep habits, academic performance, and the  
566 adolescent brain structure. *Sci Rep*. 2017;7. doi:10.1038/srep41678
- 567 44. Kurth S, Ringli M, Geiger A, LeBourgeois M, Jenni OG, Huber R. Mapping of Cortical  
568 Activity in the First Two Decades of Life: A High-Density Sleep Electroencephalogram  
569 Study. *J Neurosci*. 2010;30(40):13211-13219. doi:10.1523/JNEUROSCI.2532-10.2010
- 570 45. Sung D, Park B, Kim S-Y, et al. Structural Alterations in Large-scale Brain Networks and  
571 Their Relationship with Sleep Disturbances in the Adolescent Population. *Sci Rep*.  
572 2020;10(1):3853. doi:10.1038/s41598-020-60692-1
- 573 46. Taki Y, Hashizume H, Thyreau B, et al. Sleep duration during weekdays affects  
574 hippocampal gray matter volume in healthy children. *Neuroimage*. 2012;60(1):471–475.
- 575 47. Lapaire W, Urrila AS, Artiges E, et al. Sleep, regional grey matter volumes, and  
576 psychological functioning in adolescents. *bioRxiv*. Published online November 30, 2019.  
577 doi:10.1101/645184
- 578 48. Buchmann A, Ringli M, Kurth S, et al. EEG sleep slow-wave activity as a mirror of cortical  
579 maturation. *Cereb Cortex*. 2011;21(3):607-615. doi:10.1093/cercor/bhq129
- 580 49. Sowell ER, Trauner DA, Gamst A, Jernigan TL. Development of cortical and subcortical  
581 brain structures in childhood and adolescence: a structural MRI study. *Dev Med Child*  
582 *Neurol*. 2002;44(1):4-16. doi:10.1017/s0012162201001591
- 583 50. Koolschijn PCMP, Crone EA. Sex differences and structural brain maturation from  
584 childhood to early adulthood. *Dev Cogn Neurosci*. 2013;5:106-118.  
585 doi:10.1016/j.dcn.2013.02.003
- 586 51. Zhang B, Wing Y-K. Sex differences in insomnia: a meta-analysis. *Sleep*. 2006;29(1):85-  
587 93. doi:10.1093/sleep/29.1.85
- 588 52. Santhi N, Lazar AS, McCabe PJ, Lo JC, Groeger JA, Dijk D-J. Sex differences in the  
589 circadian regulation of sleep and waking cognition in humans. *Proc Natl Acad Sci U S A*.  
590 2016;113(19):E2730-2739. doi:10.1073/pnas.1521637113
- 591 53. Giedd JN, Castellanos FX, Rajapakse JC, Vaituzis AC, Rapoport JL. Sexual dimorphism of  
592 the developing human brain. *Prog Neuropsychopharmacol Biol Psychiatry*.  
593 1997;21(8):1185-1201. doi:10.1016/s0278-5846(97)00158-9

- 594 54. Lenroot RK, Gogtay N, Greenstein DK, et al. Sexual dimorphism of brain developmental  
595 trajectories during childhood and adolescence. *Neuroimage*. 2007;36(4):1065-1073.  
596 doi:10.1016/j.neuroimage.2007.03.053
- 597 55. Dale AM, Fischl B, Sereno MI. Cortical surface-based analysis. I. Segmentation and  
598 surface reconstruction. *Neuroimage*. 1999;9(2):179–194.
- 599 56. Fischl B, Sereno MI, Dale AM. Cortical surface-based analysis. II: Inflation, flattening, and  
600 a surface-based coordinate system. *Neuroimage*. 1999;9(2):195–207.
- 601 57. Fischl B, Dale AM. Measuring the thickness of the human cerebral cortex from magnetic  
602 resonance images. *Proc Natl Acad Sci U S A*. 2000;97(20):11050-11055.  
603 doi:10.1073/pnas.200033797
- 604 58. Fischl B, Salat DH, Busa E, et al. Whole brain segmentation: automated labeling of  
605 neuroanatomical structures in the human brain. *Neuron*. 2002;33(3):341–355.
- 606 59. Desikan RS, Segonne F, Fischl B, et al. An automated labeling system for subdividing the  
607 human cerebral cortex on MRI scans into gyral based regions of interest. *Neuroimage*.  
608 2006;31(3):968–980.
- 609 60. Schmaal L, Veltman DJ, van Erp TGM, et al. Subcortical brain alterations in major  
610 depressive disorder: findings from the ENIGMA Major Depressive Disorder working group.  
611 *Mol Psychiatry*. 2016;21(6):806-812. doi:10.1038/mp.2015.69
- 612 61. Hibar DP, Westlye LT, Doan NT, et al. Cortical abnormalities in bipolar disorder: an MRI  
613 analysis of 6503 individuals from the ENIGMA Bipolar Disorder Working Group. *Mol*  
614 *Psychiatry*. 2018;23(4):932–942.
- 615 62. van Erp TGM, Walton E, Hibar DP, et al. Cortical Brain Abnormalities in 4474 Individuals  
616 With Schizophrenia and 5098 Control Subjects via the Enhancing Neuro Imaging Genetics  
617 Through Meta Analysis (ENIGMA) Consortium. *Biological Psychiatry*. 2018;84(9):644-654.  
618 doi:10.1016/j.biopsych.2018.04.023
- 619 63. van Rooij D, Anagnostou E, Arango C, et al. Cortical and Subcortical Brain Morphometry  
620 Differences Between Patients With Autism Spectrum Disorder and Healthy Individuals  
621 Across the Lifespan: Results From the ENIGMA ASD Working Group. *Am J Psychiatry*.  
622 2018;175(4):359-369. doi:10.1176/appi.ajp.2017.17010100
- 623 64. Hoogman M, Bralten J, Hibar DP, et al. Subcortical brain volume differences in participants  
624 with attention deficit hyperactivity disorder in children and adults: a cross-sectional mega-  
625 analysis. *Lancet Psychiatry*. 2017;4(4):310–319.
- 626 65. Sun D, Ching CRK, Lin A, et al. Large-scale mapping of cortical alterations in 22q11.2  
627 deletion syndrome: Convergence with idiopathic psychosis and effects of deletion size. *Mol*  
628 *Psychiatry*. Published online June 13, 2018. doi:10.1038/s41380-018-0078-5
- 629 66. Kong X-Z, Mathias SR, Guadalupe T, et al. Mapping cortical brain asymmetry in 17,141  
630 healthy individuals worldwide via the ENIGMA Consortium. *Proc Natl Acad Sci U S A*.  
631 2018;115(22):E5154-E5163. doi:10.1073/pnas.1718418115

- 632 67. Boedhoe PSW, Schmaal L, Abe Y, et al. Cortical Abnormalities Associated With Pediatric  
633 and Adult Obsessive-Compulsive Disorder: Findings From the ENIGMA Obsessive-  
634 Compulsive Disorder Working Group. *Am J Psychiatry*. 2018;175(5):453-462.  
635 doi:10.1176/appi.ajp.2017.17050485
- 636 68. Whelan CD, Altmann A, Botía JA, et al. Structural brain abnormalities in the common  
637 epilepsies assessed in a worldwide ENIGMA study. *Brain*. 2018;141(2):391–408.
- 638 69. Nunes A, Schnack HG, Ching CRK, et al. Using structural MRI to identify bipolar disorders  
639 - 13 site machine learning study in 3020 individuals from the ENIGMA Bipolar Disorders  
640 Working Group. *Mol Psychiatry*. Published online August 2018.
- 641 70. Thompson PM, Stein JL, Medland SE, et al. The ENIGMA Consortium: large-scale  
642 collaborative analyses of neuroimaging and genetic data. *Brain Imaging Behav*.  
643 2014;8(2):153-182. doi:10.1007/s11682-013-9269-5
- 644 71. Esteban O, Birman D, Schaer M, Koyejo OO, Poldrack RA, Gorgolewski KJ. MRIQC:  
645 Advancing the automatic prediction of image quality in MRI from unseen sites. *PLoS One*.  
646 2017;12(9):e0184661. doi:10.1371/journal.pone.0184661
- 647 72. Fortin J-P, Parker D, Tunç B, et al. Harmonization of multi-site diffusion tensor imaging  
648 data. *Neuroimage*. 2017;161:149–170.
- 649 73. Fortin J-P, Cullen N, Sheline YI, et al. Harmonization of cortical thickness measurements  
650 across scanners and sites. *Neuroimage*. 2018;167:104–120.
- 651 74. Quante M, Kaplan ER, Cailler M, et al. Actigraphy-based sleep estimation in adolescents  
652 and adults: a comparison with polysomnography using two scoring algorithms. *Nat Sci*  
653 *Sleep*. 2018;10:13-20. doi:10.2147/NSS.S151085
- 654 75. Meltzer LJ, Walsh CM, Traylor J, Westin AML. Direct Comparison of Two New Actigraphs  
655 and Polysomnography in Children and Adolescents. *Sleep*. 2012;35(1):159-166.  
656 doi:10.5665/sleep.1608
- 657 76. Meltzer LJ, Wong P, Biggs SN, et al. Validation of Actigraphy in Middle Childhood. *Sleep*.  
658 2016;39(6):1219-1224. doi:10.5665/sleep.5836
- 659 77. Acebo C, Sadeh A, Seifer R, et al. Estimating Sleep Patterns with Activity Monitoring in  
660 Children and Adolescents: How Many Nights Are Necessary for Reliable Measures?  
661 *Sleep*. 1999;22(1):95-103. doi:10.1093/sleep/22.1.95
- 662 78. Meltzer LJ, Montgomery-Downs HE, Insana SP, Walsh CM. Use of Actigraphy for  
663 Assessment in Pediatric Sleep Research. *Sleep Med Rev*. 2012;16(5):463-475.  
664 doi:10.1016/j.smrv.2011.10.002
- 665 79. Patel SR, Weng J, Rueschman M, et al. Reproducibility of a Standardized Actigraphy  
666 Scoring Algorithm for Sleep in a US Hispanic/Latino Population. *Sleep*. 2015;38(9):1497-  
667 1503. doi:10.5665/sleep.4998

- 668 80. Blackwell T, Ancoli-Israel S, Gehrman PR, Schneider JL, Pedula KL, Stone KL. Actigraphy  
669 scoring reliability in the study of osteoporotic fractures. *Sleep*. 2005;28(12):1599-1605.  
670 doi:10.1093/sleep/28.12.1599
- 671 81. Kanady JC, Drummond SPA, Mednick SC. Actigraphic assessment of a  
672 polysomnographic-recorded nap: a validation study. *J Sleep Res*. 2011;20(1 Pt 2):214-222.  
673 doi:10.1111/j.1365-2869.2010.00858.x
- 674 82. van Hees VT, Sabia S, Jones SE, et al. Estimating sleep parameters using an  
675 accelerometer without sleep diary. *Sci Rep*. 2018;8(1):12975. doi:10.1038/s41598-018-  
676 31266-z
- 677 83. Slater JA, Botsis T, Walsh J, King S, Straker LM, Eastwood PR. Assessing sleep using hip  
678 and wrist actigraphy. *Sleep Biol Rhythms*. 2015;13(2):172-180. doi:10.1111/sbr.12103
- 679 84. Feliciano EC, Rifas-Shiman S, Quante M, Redline S, Oken E, Taveras E. Chronotype,  
680 Social Jet Lag, and Cardiometabolic Risk Factors in Early Adolescence. *Jama Pediatrics*.  
681 2019;173(11):1049-1057. doi:10.1001/jamapediatrics.2019.3089
- 682 85. Buysse DJ. Sleep health: can we define it? Does it matter? *Sleep*. 2014;37(1):9–17.
- 683 86. Tibshirani R. Regression Shrinkage and Selection Via the Lasso. *Journal of the Royal*  
684 *Statistical Society, Series B*. 1994;58:267–288.
- 685 87. Lim M, Hastie T. Learning interactions via hierarchical group-lasso regularization. *J*  
686 *Comput Graph Stat*. 2015;24(3):627-654. doi:10.1080/10618600.2014.938812
- 687 88. Lim M, Hastie T. Glinetnet: Learning Interactions via Hierarchical Group-Lasso  
688 Regularization.; 2020. Accessed December 8, 2020. [https://CRAN.R-](https://CRAN.R-project.org/package=glinetnet)  
689 [project.org/package=glinetnet](https://CRAN.R-project.org/package=glinetnet)
- 690 89. Soehner AM, Bertocci MA, Levenson JC, et al. Longitudinal associations between sleep  
691 patterns and psychiatric symptom severity in high-risk and community comparison youth. *J*  
692 *Am Acad Child Adolesc Psychiatry*. 2019;58(6):608-617. doi:10.1016/j.jaac.2018.09.448
- 693 90. Bertocci MA, Hanford L, Manelis A, et al. Clinical, cortical thickness and neural activity  
694 predictors of future affective lability in youth at risk for bipolar disorder: initial discovery and  
695 independent sample replication. *Mol Psychiatry*. 2019;24(12):1856-1867.  
696 doi:10.1038/s41380-018-0273-4
- 697 91. Johnson PO, Fay LC. The Johnson-Neyman technique, its theory and application.  
698 *Psychometrika*. 1950;15(4):349-367. doi:10.1007/BF02288864
- 699 92. Curran PJ, Bauer DJ. Testing and probing interactions in hierarchical linear growth models.  
700 *Methodological issues in ....* Published online 2006.
- 701 93. Preacher KJ, Curran PJ, Bauer DJ. Computational Tools for Probing Interactions in  
702 Multiple Linear Regression, Multilevel Modeling, and Latent Curve Analysis. *Journal of*  
703 *Educational and Behavioral Statistics*. 2006;31(3):437-448.



- 704 94. Lenth R, Buerkner P, Herve M, Love J, Riebl H, Singmann H. Emmeans: Estimated  
705 Marginal Means, Aka Least-Squares Means.; 2020. Accessed December 8, 2020.  
706 <https://CRAN.R-project.org/package=emmeans>
- 707 95. Patel P, Miles AE, Nikolova YS. Cortical thickness correlates of probabilistic reward  
708 learning in young adults. *Biol Psychol.* 2020;157:107975.  
709 doi:10.1016/j.biopsycho.2020.107975
- 710 96. Tamnes CK, Overbye K, Ferschmann L, et al. Social perspective taking is associated with  
711 self-reported prosocial behavior and regional cortical thickness across adolescence. *Dev*  
712 *Psychol.* 2018;54(9):1745-1757. doi:10.1037/dev0000541
- 713 97. Karama S, Colom R, Johnson W, et al. Cortical thickness correlates of specific cognitive  
714 performance accounted for by the general factor of intelligence in healthy children aged 6  
715 to 18. *Neuroimage.* 2011;55(4):1443-1453. doi:10.1016/j.neuroimage.2011.01.016
- 716 98. Li Q, Zhao Y, Chen Z, et al. Meta-analysis of cortical thickness abnormalities in  
717 medication-free patients with major depressive disorder. *Neuropsychopharmacology.*  
718 2020;45(4):703-712. doi:10.1038/s41386-019-0563-9
- 719 99. Brühl AB, Delsignore A, Komossa K, Weidt S. Neuroimaging in social anxiety disorder—a  
720 meta-analytic review resulting in a new neurofunctional model. *Neurosci Biobehav Rev.*  
721 2014;47:260-280. doi:10.1016/j.neubiorev.2014.08.003
- 722 100. Bora E, Fornito A, Yücel M, Pantelis C. Voxelwise meta-analysis of gray matter  
723 abnormalities in bipolar disorder. *Biol Psychiatry.* 2010;67(11):1097-1105.  
724 doi:10.1016/j.biopsycho.2010.01.020
- 725 101. Smitha K, Akhil Raja K, Arun K, et al. Resting state fMRI: A review on methods in resting  
726 state connectivity analysis and resting state networks. *Neuroradiol J.* 2017;30(4):305-317.  
727 doi:10.1177/1971400917697342
- 728 102. Jalbrzikowski M, Larsen B, Hallquist MN, Foran W, Calabro F, Luna B. Development of  
729 White Matter Microstructure and Intrinsic Functional Connectivity Between the Amygdala  
730 and Ventromedial Prefrontal Cortex: Associations With Anxiety and Depression. *Biol*  
731 *Psychiatry.* 2017;82(7):511-521. doi:10.1016/j.biopsycho.2017.01.008
- 732 103. Huttenlocher PR. Synaptic density in human frontal cortex - developmental changes and  
733 effects of aging. *Brain Res.* 1979;163(2):195-205. doi:10.1016/0006-8993(79)90349-4
- 734 104. Rakic P, Bourgeois JP, Eckenhoff MF, Zecevic N, Goldman-Rakic PS. Concurrent  
735 overproduction of synapses in diverse regions of the primate cerebral cortex. *Science.*  
736 1986;232(4747):232-235. doi:10.1126/science.3952506
- 737 105. Maret S, Faraguna U, Nelson AB, Cirelli C, Tononi G. Sleep and waking modulate spine  
738 turnover in the adolescent mouse cortex. *Nat Neurosci.* 2011;14(11):1418-1420.  
739 doi:10.1038/nn.2934
- 740 106. Natu VS, Gomez J, Barnett M, et al. Apparent thinning of human visual cortex during  
741 childhood is associated with myelination. *Proc Natl Acad Sci U S A.* 2019;116(41):20750-  
742 20759. doi:10.1073/pnas.1904931116

- 743 107. Bellesi M, Haswell JD, de Vivo L, et al. Myelin modifications after chronic sleep loss in  
744 adolescent mice. *Sleep*. 2018;41(5). doi:10.1093/sleep/zsy034
- 745 108. Ganji SK, An Z, Banerjee A, Madan A, Hulsey KM, Choi C. Measurement of regional  
746 variation of GABA in the human brain by optimized point-resolved spectroscopy at 7 T in  
747 vivo. *NMR Biomed*. 2014;27(10):1167–1175.
- 748 109. Tottenham N, Sheridan MA. A Review of Adversity, The Amygdala and the Hippocampus:  
749 A Consideration of Developmental Timing. *Front Hum Neurosci*. 2010;3.  
750 doi:10.3389/neuro.09.068.2009
- 751 110. Merz EC, Tottenham N, Noble KG. Socioeconomic Status, Amygdala Volume, and  
752 Internalizing Symptoms in Children and Adolescents. *J Clin Child Adolesc Psychol*.  
753 2018;47(2):312-323. doi:10.1080/15374416.2017.1326122
- 754 111. Yoo S-S, Gujar N, Hu P, Jolesz FA, Walker MP. The human emotional brain without sleep-  
755 -a prefrontal amygdala disconnect. *Curr Biol*. 2007;17(20):R877-878.  
756 doi:10.1016/j.cub.2007.08.007
- 757 112. van Erp TGM, Hibar DP, Rasmussen JM, et al. Subcortical brain volume abnormalities in  
758 2028 individuals with schizophrenia and 2540 healthy controls via the ENIGMA  
759 consortium. *Molecular Psychiatry*. 2016;21(4):547-553. doi:10.1038/mp.2015.63
- 760 113. Logue MW, van Rooij SJH, Dennis EL, et al. Smaller Hippocampal Volume in  
761 Posttraumatic Stress Disorder: A Multisite ENIGMA-PGC Study: Subcortical Volumetry  
762 Results From Posttraumatic Stress Disorder Consortia. *Biol Psychiatry*. 2018;83(3):244-  
763 253. doi:10.1016/j.biopsych.2017.09.006
- 764 114. Chung Y, Haut KM, He G, et al. Ventricular enlargement and progressive reduction of  
765 cortical gray matter are linked in prodromal youth who develop psychosis. *Schizophr Res*.  
766 2017;189:169-174. doi:10.1016/j.schres.2017.02.014
- 767 115. Lo JC, Loh KK, Zheng H, Sim SKY, Chee MWL. Sleep Duration and Age-Related Changes  
768 in Brain Structure and Cognitive Performance. *Sleep*. 2014;37(7):1171-1178.  
769 doi:10.5665/sleep.3832
- 770 116. Blake MJ, Sheeber LB, Youssef GJ, Raniti MB, Allen NB. Systematic Review and Meta-  
771 analysis of Adolescent Cognitive-Behavioral Sleep Interventions. *Clin Child Fam Psychol*  
772 *Rev*. 2017;20(3):227-249. doi:10.1007/s10567-017-0234-5
- 773 117. Suh S, Kim H, Dang-Vu TT, Joo E, Shin C. Cortical Thinning and Altered Cortico-Cortical  
774 Structural Covariance of the Default Mode Network in Patients with Persistent Insomnia  
775 Symptoms. *Sleep*. 2016;39(1):161-171. doi:10.5665/sleep.5340
- 776 118. LeWinn KZ, Sheridan MA, Keyes KM, Hamilton A, McLaughlin KA. Sample composition  
777 alters associations between age and brain structure. *Nat Commun*. 2017;8.  
778 doi:10.1038/s41467-017-00908-7

779  
780  
781

782 **FIGURE CAPTIONS**

783

784 **Figure 1.** Relationships between sleep and gray matter (cortical thickness, subcortical volume)  
785 that are developmentally-invariant (i.e., stable across age) or developmentally-specific (i.e., only  
786 present during discrete time windows) from late childhood through young adulthood.

787 **Figure 2.** Johnsyon-Neyman plots of age by neuroimaging measure interactions on sleep  
788 dimensions (A. duration, B. timing, and C. continuity). A statistically significant relationship  
789 between age and the neuroimaging measures ( $p < .05$ ) is represented by the red color. Non-  
790 significant relationships are represented by the gray color. To aid in the interpretation of the  
791 plots, we provide one example of the age by cuneus cortical thickness interaction on sleep  
792 duration. a. From 9-17.3 years old, thicker cuneus cortex is associated with longer sleep  
793 duration ( $r=0.33$ ,  $p=1.0 \times 10^{-4}$ ). b. From 17.4-25.9 years old, this relationship is not present ( $r=-$   
794  $0.003$ ,  $p=0.97$ ).

795

796

797

798

799

800

801

802

803

804

805

806

807

808

809

810

811 **Table 1:** NAPS sample characteristics

| <b>Variable</b>                  | <b>Mean or n (sd or %)</b> |
|----------------------------------|----------------------------|
| Sample N                         | 240                        |
| Age (Years)                      | 18.13 (5.26)               |
| Self-reported Sex                |                            |
| Female                           | 133 (55%)                  |
| Male                             | 107 (45%)                  |
| Ethnicity                        |                            |
| Non-Hispanic                     | 223 (93%)                  |
| Hispanic                         | 15 (6%)                    |
| Missing                          | 2 (1%)                     |
| Race                             |                            |
| White                            | 170 (71%)                  |
| Black                            | 40 (17%)                   |
| Asian                            | 11 (5%)                    |
| Multiple                         | 16 (7%)                    |
| Unknown/Missing                  | 3 (1%)                     |
| Wrist Actigraph Type             |                            |
| AMI Octagonal MotionLogger       | 36 (15%)                   |
| PR/MiniMitter Actiwatch64        | 25 (10%)                   |
| PR Actiwatch2                    | 113 (47%)                  |
| PR Spectrum Series               | 66 (28%)                   |
| Tracking Days                    | 6.59 (0.84)                |
| Weekdays                         | 4.51 (0.92)                |
| Weekend Days                     | 2.08 (0.52)                |
| Season                           |                            |
| Spring                           | 43 (18%)                   |
| Summer                           | 100 (42%)                  |
| Fall                             | 52 (22%)                   |
| Winter                           | 45 (19%)                   |
| Sleep Duration (min)             | 417.96 (63.52)             |
| Wake After Sleep Onset (minutes) | 56.19 (26.83)              |
| Midsleep (minutes from midnight) | 289.99 (76.59)             |
| Midsleep Variability (minutes)   | 63.66 (44.06)              |

812

813

814

815

816

817

818

819 **Table 2.** Main effects and interactions between age, sex, and neuroimaging measures on  
 820 actigraphic sleep dimensions. Model weights are reported as standardized regression  
 821 coefficients.

| <b>A. Sleep Duration (Total Sleep Time)</b>                                                         |                                     |                     |
|-----------------------------------------------------------------------------------------------------|-------------------------------------|---------------------|
| <i>Type of Effect</i>                                                                               | <i>Variable</i>                     | <i>Model Weight</i> |
| Demographic Variable Main Effects                                                                   | Sex                                 | 0.0403              |
|                                                                                                     | Age                                 | -0.0732             |
| Subcortical Volume Main Effects                                                                     | Pallidum                            | -0.0122             |
|                                                                                                     | Hippocampus                         | -0.0529             |
|                                                                                                     | Amygdala                            | -0.0032             |
|                                                                                                     | Lateral Ventricles                  | 0.0221              |
| Cortical Thickness Main Effects                                                                     | Medial Orbitofrontal Cortex         | 0.1090              |
|                                                                                                     | Parahippocampal Cortex              | 0.0022              |
|                                                                                                     | Posterior Cingulate                 | 0.0576              |
|                                                                                                     | Isthmus Cingulate                   | 0.0196              |
|                                                                                                     | Superior Parietal Cortex            | 0.0067              |
|                                                                                                     | Cuneus                              | 0.0277              |
| Sex Interactions                                                                                    | Sex x Parahippocampal Cortex        | 0.0054              |
|                                                                                                     | Sex by Posterior Cingulate Cortex   | -0.0219             |
| Age Interactions                                                                                    | Age x Lateral Ventricles            | 0.0234              |
|                                                                                                     | Age x Cuneus                        | -0.0332             |
|                                                                                                     | Age x Superior Parietal Cortex      | -0.0072             |
| Variance Accounted for by demographic measures only: $R^2=0.22$                                     |                                     |                     |
| Variance Accounted for by neuroimaging and demographic measures, and their interactions: $R^2=0.25$ |                                     |                     |
| <b>B. Sleep Timing (Midsleep)</b>                                                                   |                                     |                     |
| <i>Type of Effect</i>                                                                               | <i>Variable</i>                     | <i>Model Weight</i> |
| Demographic Variable Main Effects                                                                   | Sex                                 | -0.0601             |
|                                                                                                     | Age                                 | 0.1315              |
| Subcortical Volume Main Effects                                                                     | Thalamus                            | -0.0009             |
|                                                                                                     | Pallidum                            | 0.0120              |
|                                                                                                     | Lateral Ventricles                  | 0.0057              |
| Cortical Thickness Main Effects                                                                     | Medial Orbitofrontal Cortex         | -0.0002             |
|                                                                                                     | Pars Orbitalis                      | -0.0136             |
|                                                                                                     | Rostral Middle Frontal Cortex       | -0.0200             |
|                                                                                                     | Posterior Cingulate Cortex          | -0.0089             |
|                                                                                                     | Superior Parietal Cortex            | -0.0051             |
|                                                                                                     | Lateral Occipital Cortex            | -0.1115             |
| Sex Interactions                                                                                    | Sex x Lateral Ventricles            | 0.0342              |
|                                                                                                     | Sex x Thalamus                      | 0.0010              |
| Age Interactions                                                                                    | Age x Pallidum                      | -0.0431             |
|                                                                                                     | Age x Medial Orbitofrontal Cortex   | 0.0002              |
|                                                                                                     | Age x Pars Orbitalis                | 0.0187              |
|                                                                                                     | Age x Rostral Middle Frontal Cortex | 0.0267              |
|                                                                                                     | Age x Posterior Cingulate Cortex    | 0.0189              |
| Variance Accounted for by demographic measures only: $R^2=0.10$                                     |                                     |                     |
| Variance Account for by neuroimaging and demographic measures, and their interactions: $R^2=0.20$   |                                     |                     |

| <b>C. Sleep Continuity (WASO)</b>                                                                 |                                |                     |
|---------------------------------------------------------------------------------------------------|--------------------------------|---------------------|
| <i>Type of Effect</i>                                                                             | <i>Variable</i>                | <i>Model Weight</i> |
| Demographic Variable Main Effects                                                                 | Sex                            | -0.0444             |
|                                                                                                   | Age                            | 0.0244              |
| Subcortical Volume Main Effects                                                                   | Thalamus                       | 0.0065              |
|                                                                                                   | Pallidum                       | 0.0260              |
|                                                                                                   | Caudate                        | 0.0083              |
| Cortical Thickness Main Effects                                                                   | Entorhinal Cortex              | 0.0009              |
|                                                                                                   | Parahippocampal Cortex         | -0.0192             |
|                                                                                                   | Middle Temporal Cortex         | -0.0086             |
|                                                                                                   | Precentral Cortex              | -0.0283             |
|                                                                                                   | Superior Parietal Cortex       | -0.0243             |
|                                                                                                   | Lateral Occipital Cortex       | -0.0149             |
| Sex Interactions                                                                                  | Sex x Caudate                  | -0.0117             |
|                                                                                                   | Sex x Entorhinal Cortex        | -0.0021             |
|                                                                                                   | Sex x Precentral Cortex        | -0.0151             |
| Age Interactions                                                                                  | Age x Parahippocampal Cortex   | 0.0533              |
|                                                                                                   | Age x Superior Parietal Cortex | 0.0622              |
| Variance Accounted for by demographic measures only: $R^2=0.05$                                   |                                |                     |
| Variance Account for by neuroimaging and demographic measures, and their interactions: $R^2=0.16$ |                                |                     |

822

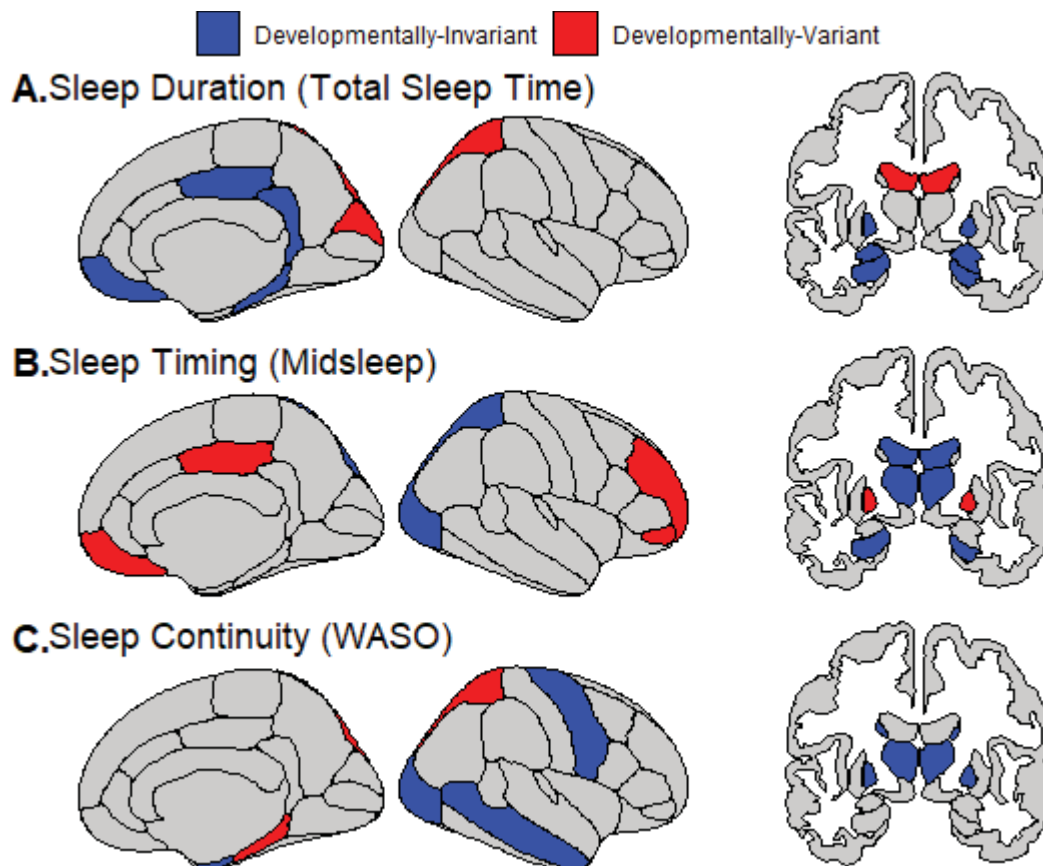

## A. Sleep Duration (Total Sleep Time)

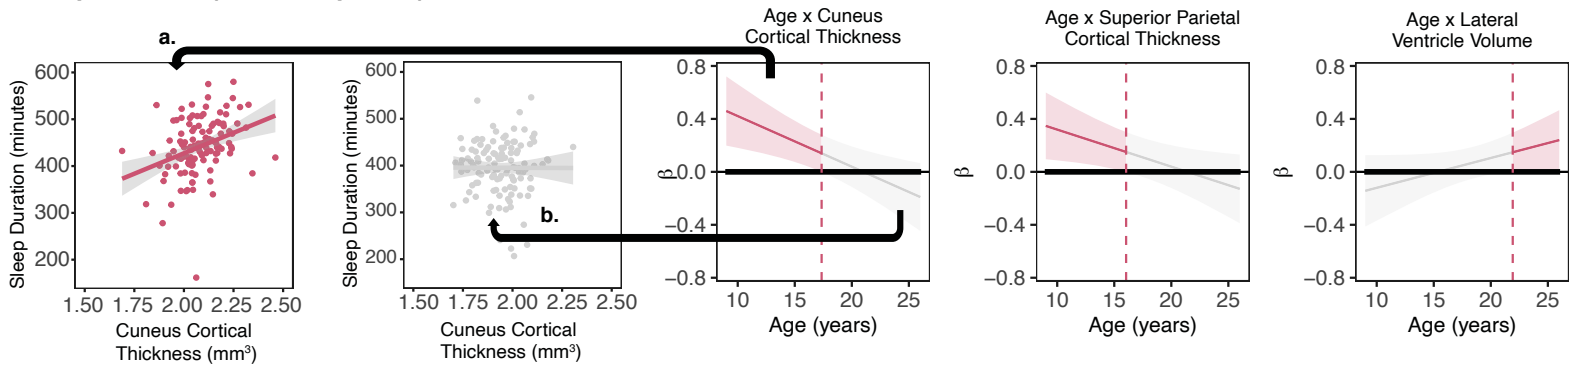

## B. Sleep Timing (Midsleep)

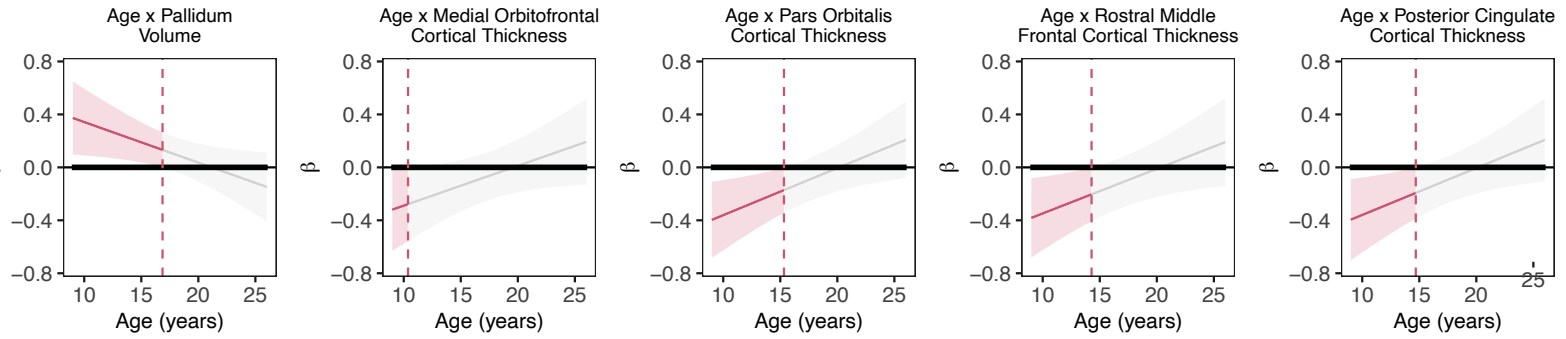

## C. Sleep Continuity (WASO)

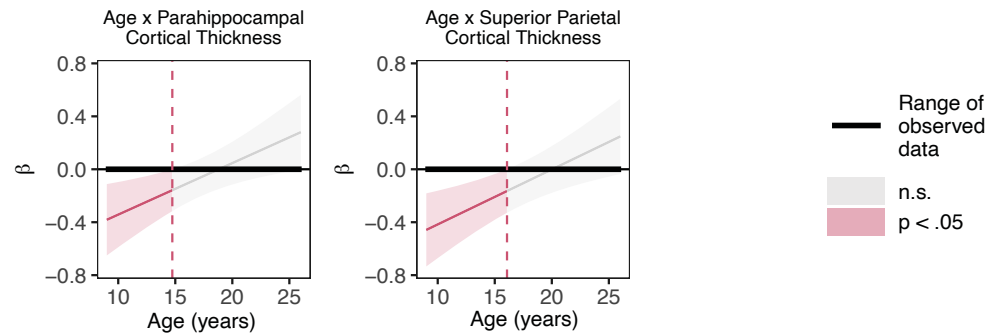

Source: https://biorxiv.org/content/10.1101/2021.01.05.424689v1.full.pdf
